# Supplementary material for: Activin signaling pathway specialization during embryonic and skeletal muscle development in rainbow trout (Oncorhynchus mykiss)
Source: Research Square preprint supplement (doi:10.21203/rs.3.rs-3934487/v1), 2024-03-05
Supplement: Supplementary file 1 [file c8100e07c15f2b61734d4dfa.xlsx]

## Sheet: Sheet1
Supplementary Table 1
Target Gene Probe Sequences
	Name	Accession	Probe Sequence
1	acvr1aa1	XM_021579157.2	CGACGGGCCATCATGCGACAGCGGAGAGCGTTGTATTGGCCAGCAGTGCTTCTCGGCCGTCTCCATCCAGAACGCCACGTTCTTCCGACGGAAGGGGTGC
2	acvr1aa2	XM_021597030.2	AGGATTTGCCGTAGCCTAGCTCTGCTACATGAAATATCCGCCTAGGGGTTATTACCGTTCGTATATGGAGTGAAGAACACCAAAGCTTATGGAACTCTGG
3	acvr1ab1	XM_021571148.2	TGAACAAGATCCATAGCTCCCTGGAGAAAGGAAAGAAGTCGTGAGGAGAGGAAAGGAGGACGACTGCCAGAGGAGCGATAGAAAGAAGGCAGGGAAGTAG
4	acvr1ab2	XM_021611047.2	GGCAGGCTACAGCGACTACAGGAGTTTGACCCAGAACAGGATGCGATTGACGGACTCATCACCTCTAATGTTGGGGACAGCACTCTGGCTGAGCTGTTGG
5	acvr1ba	XM_021616793.2	GGAAAGTCACTTCTCTAGGCATGTCCCAATATACATCAGCAGAGTAGACTGCAGCTATTCTAATACTGTTTTCAGAAGCCTGGAAAAAACTACAGGCTAT
		XM_021565870.2
6	acvr1ba2	XM_021565870.2	AGGAGGACATCAAGATGTAAGATAAGAGTGGGACGGACAGGCGGCAGAGCCAGGTAGCTCGCTGGAGACGCACAACGATAGACACAGGCTGTATATCAAA
7	acvr1bb1	XM_021569270.2	ATGGCCCCTGAGGTTCTGGATGAGAGCATCAACATGAGGCATTTTGATTCGTTTAAGTGTGCAGACATCTACGCTCTGGGCCTGGTTTACTGGGAGATCA
8	acvr1bb2	XM_021609938.2	GTTGTAATGGAACTCCTATTGCCCACTTAGAGGCAGGAATGGTCCATACAAACACCTGGCTCTATGGTATTTCATGACGATGGACTTTAGTGTAGCCATT
9	acvr1ca1	XM_021579162.2	AGCCCACTGGCTGGCGCACCAGAATGTACTGTTATTGGTCTGGAGCAAAGCATCCTCAAGACCACGCTGAAACAAGAAACACTCAGCTGGGTCGTATTAA
10	acvr1ca2	XM_036974311.1	GACTGCTTATGTGAACACTAATGCCATTGTCAGACTTGGCTTGTAATCTCTTGCCATAACAGGCTTAGGAACGGGGACTTAAACTAAATCTGCTGTGGGT
11	acvr2aa1	XM_021597328.2	GGAAGAAGGAATGAGAATTATATCGACTGGAGTCGGTCAAGGAAAACCTCAACATTAAACCAAGAAAACTCGACGAAAGAGACTAGCTACTTCTAACGGA
12	acvr2aa2	XM_021579736.2	CTCCCTAAGCAGAAGGTCAGGACTCTTTCCAACGTTCGTCGCTAACTCTGGGACTATACCCAAAGAGGCGCCAAAATAATTTAGTGGACCTGGGTTCATG
13	acvr2ab1	XM_021571458.2	ACCCTTCTCGCTCTCACAGTTCCTAGCTACTAACCTTCTGTCTCTCCAGTCCCTAACTACTACCCTTCTGCTTTGAGACGCCGGTGACCCATCTCTTCCT
14	acvr2ab2	XM_036983026.1	ACCCACTTCATAGTATCACGATGTGTTGGATTCAGATGGACTCCCATAGCGAGCCTCAAACTGTACAACAGACTCCTTCAAAGGAGCAACACTAGGTCGT
15	acvr2ba1	NM_001190941.1	CCTCGCTACAAAGGAGAGGGACCCAAACCGGCCATTGCTCACAGGGACTTCAAGAGTAAGAATGTGATGCTGCGGACAGACCTGACGGCCATCATCGGGG
16	acvr2ba2	XM_021620174.2	ACCCACCCAACGCAGAGCGACAACATGCAAGCAAACAAAACAGCCGTGTCTTGTTCTTCTTCAGCTTCAGCCGATCTCAGAAGATGAAAAAACATGAATG
17	acvr2bb	XM_036986636.1	GAATTCCATGAGCGGGGTTCGTTGACTGACCATCTGAAGGACCGTACAGTGACCTGGTCTGAAATGTGTCACATTGCTGAGACGATGTCCCGTGGTCTGG
18	bambia1	NM_001160484.1	GTGTCTAGATCCCATAGCGAACGCTGCCGACATGTGCAGCTCTAAGAACACAAATGCCCTGAGTGAGGGTTTGTCTATGCTGGAGTGCTGTCACGACGAC
19	bambia2	XM_036944343.1	AAAAAGAGGACAGAATTGAACGCAAGCCTTGTGGTTTTTGCTAAAGGAGCACTTTACTTGAAAATTAAAGGCAAACCAATGAGGAGCTGAGCGGGCAGGG
20	fsta	NM_001160483.1	TGCAGTGTGGGGAAGAAGTGTCTGTGGGACGCCAGGATGAGCCGAGGCCGCTGCTCCCTCTGTGAGGAGGCGTGTTCAGAGAGCCGGATGGACGAGGCGG
		XM_036977638.1
21	gdf11b1	XM_021569041.2	CACCTGCAATGGACCTTTAAAAGTGAACAGGAAAGGGTTGTAACACACATTCTGTTTTACTGCAGAAGCTCATAACAGCTCAGGTGACCTCAATATCAAC
22	gdf11b2	XM_021610109.2	TCTTAGGCCCAACGGAAGTCATGCATACTCATGCACACCCAACTCTGCATTATTTCCACCCAGAACCCTGACTGAGACCTCCTCTGGCAGCAGACTCTCA
23	inhab	NM_001124200.1	CTTCCTCCTCACTTCAGACCAGCAGCTCCTCCAGGTGGCAGAGTTTCCGGCCAAGACCACCGCTGATGGCTGGACCACCTACCACTTCGAGCACCACCTC
		XM_021610999.2
24	inhab2	XM_021610999.2	AACCTCCAAATAATACAGGACTTCATTGACACCACTTGTCCACCGACTCAGGACAGAGAAGGATCTACACTACTTCACTTCATCTACTAGAAGTTTTGGC
25	inhbaa1	XM_021563084.2	CTGTTAGCAATCACTTCACAAAGACGTCCAGGTCAGCATTAGCACAGCCTAGCATCAGTGCCCAAACATTCCTTCAGCTCCTGCACATAAACGTAATTTC
26	inhbaa2	XM_021620643.2	GGCGCCCAGATGCCGCCGACATGGTCGAGACGACTGAGATCCTTACCTTCGCAGAGGCCGGCGACTCCCAGGGTGCGGTCAACTTCCTCATTTCCAAGGA
27	inhbab1	XM_021590092.2	CTGCAGCTCAACACACTGTCCTATATCCCAGGCACTTTGTTCAAGGACTAAAGTAGCGTGGACACGCTCTACCGAATACGAGACTGGAGAGAGTGGACAA
28	inhbab2	XM_021612708.2	TGCTGGCCCAGATGACGAGGGGTTATGACCCGGTCCCTCCTGGATTTGAATCAGCATCTGAATCTGTGGCTTGGACTTCGGGCCAAACGGACATGGTGGA
29	inhbba1	XM_021597476.2	CCCTAACGTGTGCATCAATCATAATTCCATGTGCAAACTATTCCCGCTGGCGCAGAGCTGGATATTTACCAGGATGCTAAACTTGTGAAGTAGCCTAACT
30	inhbba2	XM_021579634.2	CCTTCAAAGTGGTACTGAGTGTCCTGTCATAAATAAGTGCCACATGATCTATGCAATGTATAGTAATCCACCCATGCCCACCCATACAACTGAACATACC
31	inhbbb1	XM_021608812.2	TCATTTTACGGGCCAGCGTCCGGAAATCAAAATGGCTTCCGTGTCAGAAGAGTGAGCGGAACATAAAAATTACATTCCAACACACTGAATGCTGAAGCTG
32	inhbbb2	XM_021571398.2	AGCCTGAGATTATGAAGGAGGTGCGCTTGCTGATAGACAATTCCAAACCACGCCTCTCTCAAGAAAGTATGAGTGCAAAATGTATAGTGAAAGCCCTGAC
33	inhbcb1	XM_021570106.2	AGTTGGGTAAGACCATGGACATGGCTCATCAGCCATTTGTGGTGGCCCAGGTGCGGCTCCGTGACAACTTCAAGCACATCCTCCAGAGGAGGTCCCTGCG
34	inhbcb2	XM_021609137.2	CAGATAGTCAGTTAGGCAACAGTCTGGCTTTGACGGCATGAACGCAAGGTTATTACTCAGCTGTACAAGCAAACATTTAGCTATTGCCACAGTGTCAGGG
35	mstna	NM_001124282.1	CTTGGAGATGACAATAAGGATGGACTTATGGAAGAAGATGATGAACATGCCATCACAGAAACAATCATGACAATGGCCACTGAACCCGAATCCATCGTCC
		NM_001124283.2
36	mstnb1	NM_001124576.1	CATACGGATCCTCTCCCTGAAGATCGATGTGGCTTCTGGTGCAAGCTCTTGGCAAAGTGTAGACATCAATCAATTACTCAAAACCTGGCTTCGTCAGCCA
37	mstnb2	XR_002469620	CCTGAGTGGGAGGATGAGAGGACAGGACAAAACACACACGCACATTGTGTTGTGTAATGAGTTAAAAAAGTTATCCCAAAGTGAACCCTCTTACAAGAAT
38	myod1	NM_001124720.1	GTCAGTCTTGTCCACCAAGACGGAGAAACAAGTATGATAGCACCTACTTCAACGAAGCACCAAATGATTCCAGACACAAGAAGAACTCTGTTATTTCCAG
		XR_005051975.1
		XR_005051975.1
39	smad2a	NP_001268237	ATAGGACGAGGAGTCAGGCTGTATTATATTGGTGGTGAGGTGTTTGCTGAGTGTCTCAGTGATAGCGCCATCTTTGTTCAAGGTCCAAACTGCAACCAGC
		NP_001268263
40	smad3a1	XM_036981435.1	CCACAGCATGGACACCAGTTCACCCAACCTGTCACCAAACCCAGTGTCTCCAACACACAGCAATTTAGACCTACAGCCTGTGATGTACTGTGAACCAGCC
41	smad3a2*	NM_001165100.1	CTGCAGGGCTGCAGGCTGGTGCCACCGACTCACACGGCAGCATGTTTGAGCAGGAGAAAGACAGTCCCTGATTTTGTGTCTGGATTAAGGGCCATTCTGT
42	smad4aa1	XM_036979385.1	TCTCATCAATCGCCCTGGTGACCTCAGATTGGTCACTTTTACCAGTGATTCCATCTGGCTAACCTTGTATGGTTATCCAGAGCATAGTTCTACTATGGTA
43	smad4aa2	XM_021620841.2	CAATTCGAGCGCAAATGCAAGAGCAGAAATACCGCGTTTGCAGGCCCTTGAAGCGGTGGGTTTTGGGGGCACAGCAAGTGTGACTATCCATTTAATTTTG
44	smad4ab2	XM_021602773.2	TAGCCATTTGAACGCTGTCCGGGATGAGAGAGGGGTGTAAATTATTAATTTTTTCTACCCACTGGCATCAAAGCCAGCCAGGGTTCCTTCTCTGAAGATA
45	smad4ba1	XM_036970957.1	CTTAAGTGGGGCCTCTCCAAAGCATGACTATTTACTCCTCCAGTCAGAGTGGGATTTCTACTAAGCCTACATGTTGGCAACAATGGTCAAGGTCAAAAAG
46	smad4ba2	XM_036952869.1	CATTGGCTGGTGCTCAGCGAGACACTCACGCGCACAATATCTTCCTTCTTTTGTTATTGTACGGAGCGCGAGGTTTCTGGGCGCTAGCAGGATGCACGAG
47	smad4bb1	XM_021557800.2	TCTGCCAGTTCGCCTTTGACCTCAAGTATGACAATGTGTGTGTCAACCCCTACCACTACGAGCGAGTGGTATCGCCAGGCATTGTTGGTCTCAGCATTCA
48	smad4bb2	XM_036971851.1	CCTGAAGCAGTTTAGACTGCAAAATGTACTTGCTCAACAGCCCAATCTTTTCACAGAGACTGGAACTTGCACTAAAGGCATCAATGCTTTTTAGTAGTGG
49	smad6a1	XM_021591141.2	TACCGATGGACTGACCTACACCACTCGACTCAACTCAAAGCGCTGTGCCACTGTCAAAGCTTCCGGGCATTGGACAGCAGCGAAACGGTGTGCTGTAACC
50	smad7b2	XM_036936879.1	AGGGATATTTCGACATATAATTCTGGTACAACGGACGGTAGACGGGGACTCTGTGCGACTGCCCTACTAAGGCAGATTTCTGTCTGGCACTAAAGCGGCT
Reference Gene Probe Sequences
1	actb	NM_001124235.1	TTTCAGAACAGGTATTTGCCTCTGTGAAGGCTGCCGGCTTCCGGCTCTCTGCCACAGCGTTCTGTAACATGGGGCAGTATGGCTTGTATGTAAATTATGT
2	ef1a	NM_001124339.1	CCAGCGGCAAGGTCACCAAATCTGCCGTTAAGGCTGGTAAAAAGTGAATTCTCCTCCCACAGGATGTCCCTCGGGTGGTGGGGTCTGCAGCCCTACATCC
3	rpl13	XM_021586171.2	AGGCGAAAGGCACGTCAGATCAAGGCTCGTCGTATTGCCCCACGTCCTGTGGCCGGACCCCTCCGGCCTCAAGTCAGGTGTCCCACCATCAGGTATCACA
4	rpl8	XM_021578858.2	AGTCAAGCTTCCCTCTGGCTCCAAGAAGGTCATTGCTTCTGCTAACAGAGCTGTCGTTGGTGTGGTTGCCGGAGGTGGACGTATTGACAAGCCCATCCTG
5	tbp	XM_021581318.1	GTGCCGTTTTAGGGACGTGGTCAAAATTATCTAGCTAAGGGGTTCCCTGCTACGCTCCGTTCCAACACATGACTTTTGTCGGCATTTTCAGAATTGCTCC
